# Supplementary material for: Different rates of pollen and seed gene flow cause branch‐length and geographic cytonuclear discordance within Asian butternuts
Source: PubMed Central journal article supplement (PMC8519134; doi:10.1111/nph.17564), 2021-07-13
Supplement: NPH-232-388-s001.pdf [file NPH-232-388-s001.pdf]

### ***New Phytologist* Supporting Information**

Article title: Different rates of pollen and seed gene flow cause branch-length and geographic cytonuclear discordance within Asian butternuts

Authors: Lin-Lin Xu<sup>1†</sup>, Rui-Min Yu<sup>1†</sup>, Xin-Rui Lin, Bo-Wen Zhang, Nan Li, Kui Lin, Da-Yong Zhang\* and Wei-Ning Bai\*

Article acceptance date: 13 June 2021

The following Supporting Information is available for this article:

**Fig. S1** Linkage disequilibrium (LD) decay patterns of Asian butternuts (*Juglans mandshurica*, *Juglans ailantifolia* and *Juglans cathayensis*).

**Fig. S2** Schematic of demographic model analyzed using *fastsimcoal2* based on 23,750 SNPs of Asian butternuts. The numbers in square brackets indicate the 95% CI of divergence time and effective population size. The grey and olive rectangles represent the most recent common ancestors of Asian butternuts and *J. mandshurica* and *J. ailantifolia*, respectively.

**Fig. S3** Environmental variables used in the gradient forest modeling. \*Top-ranked, uncorrelated environment variables (Pearson's  $|r| < 0.8$ ) and accuracy important  $\geq 0.004$ .

**Fig. S4** StarBEAST2 analysis of Asian butternuts based on 100 single-copy nuclear genes. Posterior probabilities are labeled on each node (red number) and the numbers in square brackets are the 95% HPD of divergence time in Ma.

**Fig. S5** Histograms of the STRUCTURE assignment test for 80 individuals of Asian butternuts based on the SNPs of genes interacting with chloroplast (a), mitochondria (b) and dual (both mitochondrial and chloroplast) (c).

**Fig. S6** Maximum likelihood tree of 300 genes with nucleo-cytoplasmic interaction of Asian butternuts. Bootstrap support values are labeled on each node.

**Table S1** Details of sample locations and descriptive statistics of genome sequencing for 80 individuals of Asian butternuts.

**Table S2** Environmental variables were ordered by ranked importance.

**Table S3** Information of the 300 genes with nucleo-cytoplasmic interaction in Table S3.txt (see separate file). The first three columns are the gene ID, category and CyMIRA targeting of *Arabidopsis thaliana* and the remaining columns are the gene ID, gene length, SNP number, mean  $F_{ST}$ , maximum  $F_{ST}$ , minimum  $F_{ST}$  of *J. mandshurica*.

**Notes 1** Methods for extracting single copy nuclear genes in PhyloNet analysis.

**Notes 2** Python script for conducting McDonald-Kreitman tests (see separate file).

**Note 3** Methods for environmental variables identification.

**Fig. S1** Linkage disequilibrium (LD) decay patterns of Asian butternuts (*J. mandshurica*, *J. ailantifolia* and *J. cathayensis*).

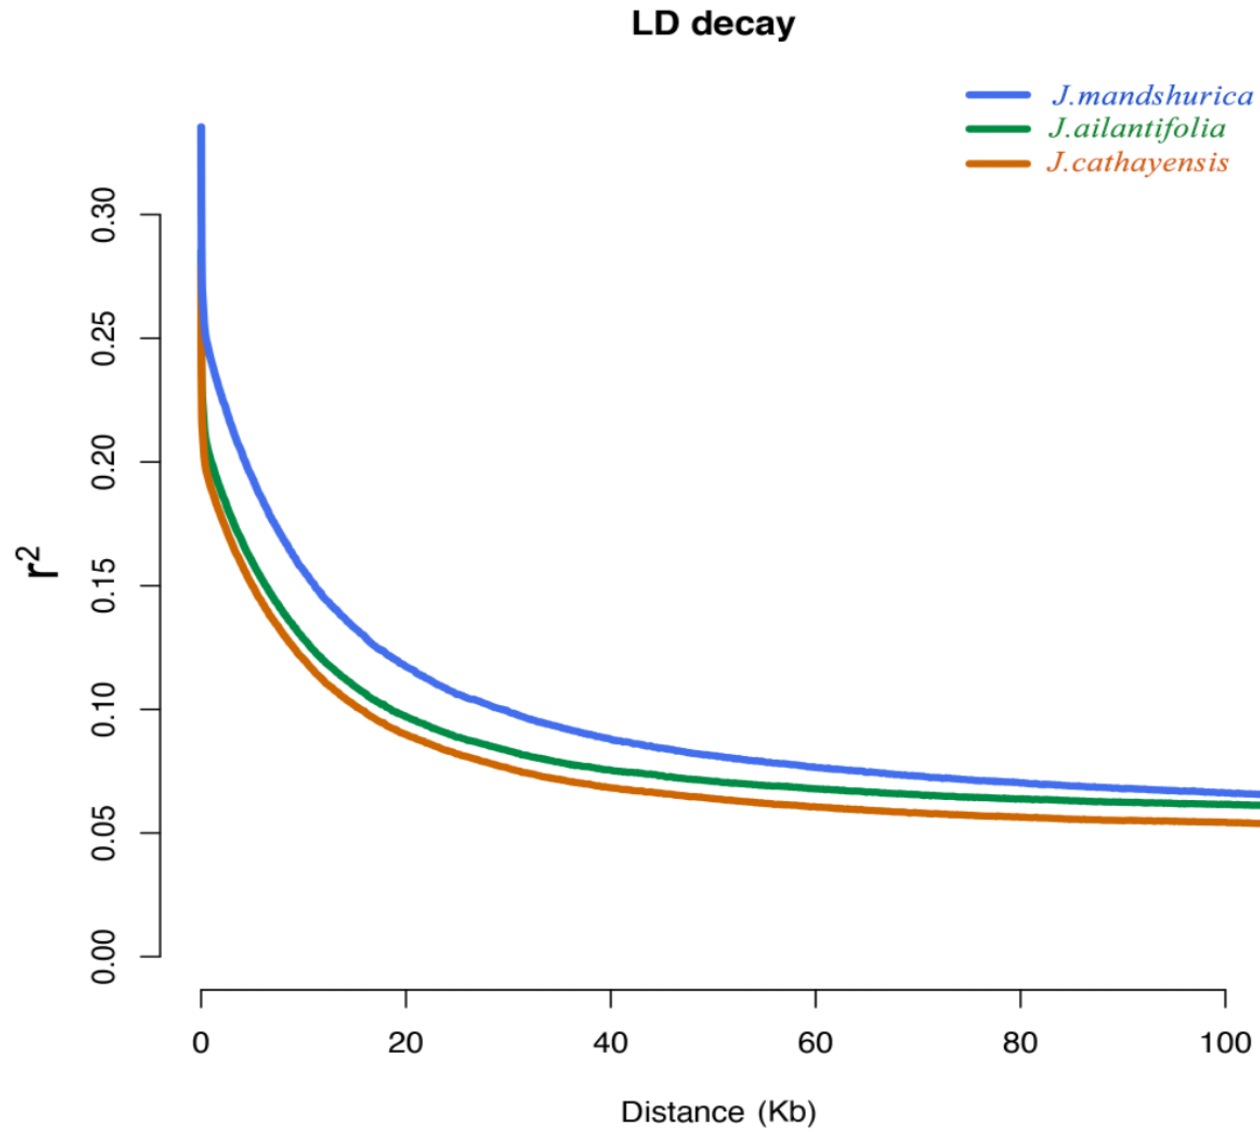

**Fig. S2** Schematic of demographic model analyzed using fastsimcoal2 based on 23,750 SNPs of Asian butternuts. The numbers in square brackets indicate the 95% CI of divergence time and effective population size. The grey and olive rectangles represent the most recent common ancestors of Asian butternuts and *J. mandshurica* and *J. aillantifolia*, respectively.

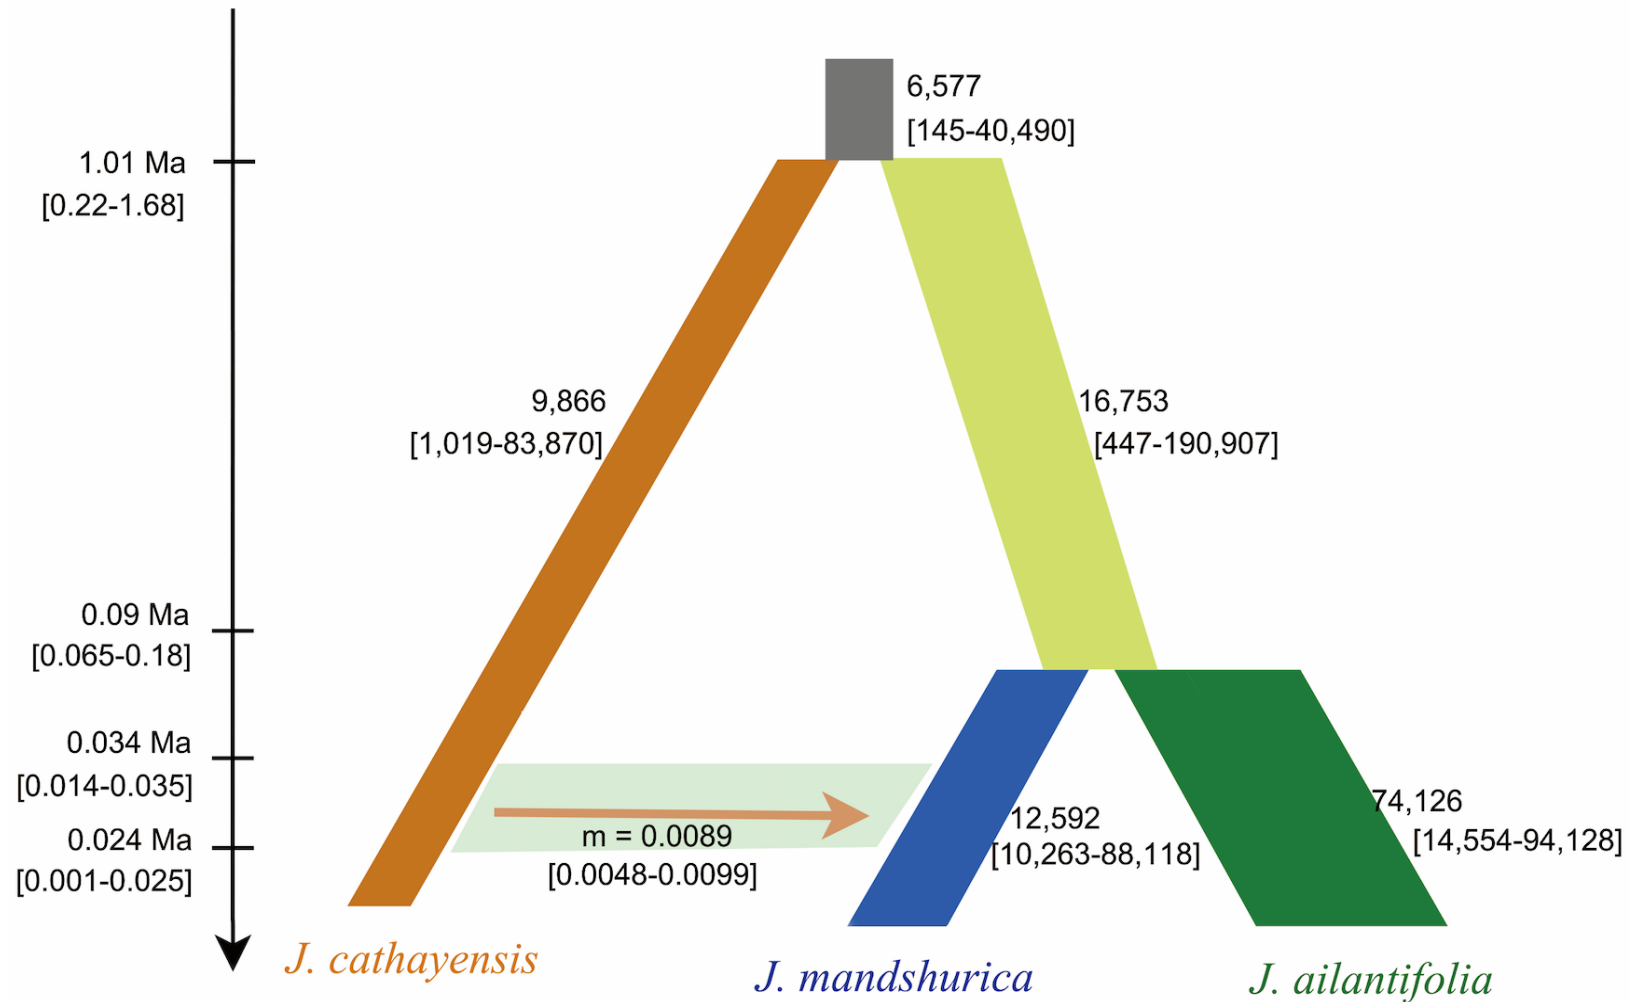

**Fig. S3** Environmental variables used in the gradient forest modeling. \*Top-ranked, uncorrelated environment variables (Pearson's  $|r| < 0.8$ ) and accuracy important  $\geq 0.004$ .

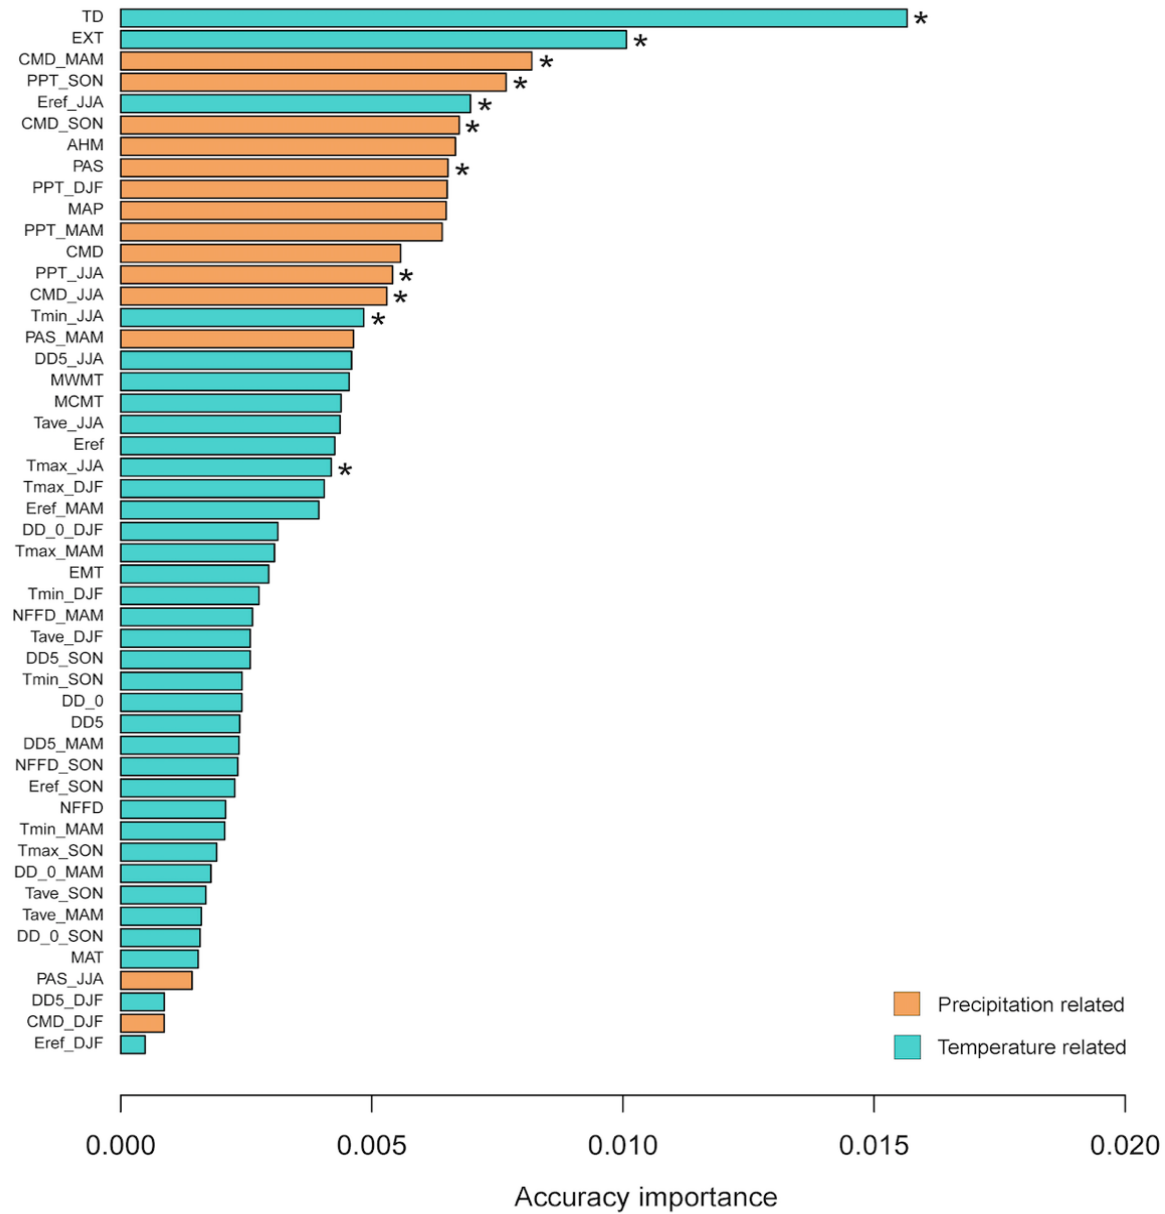

**Fig. S4** StarBEAST2 analysis of Asian butternuts based on 100 single-copy nuclear genes. Posterior probabilities are labeled on each node (red number) and the numbers in square brackets are the 95% HPD of divergence time in Ma.

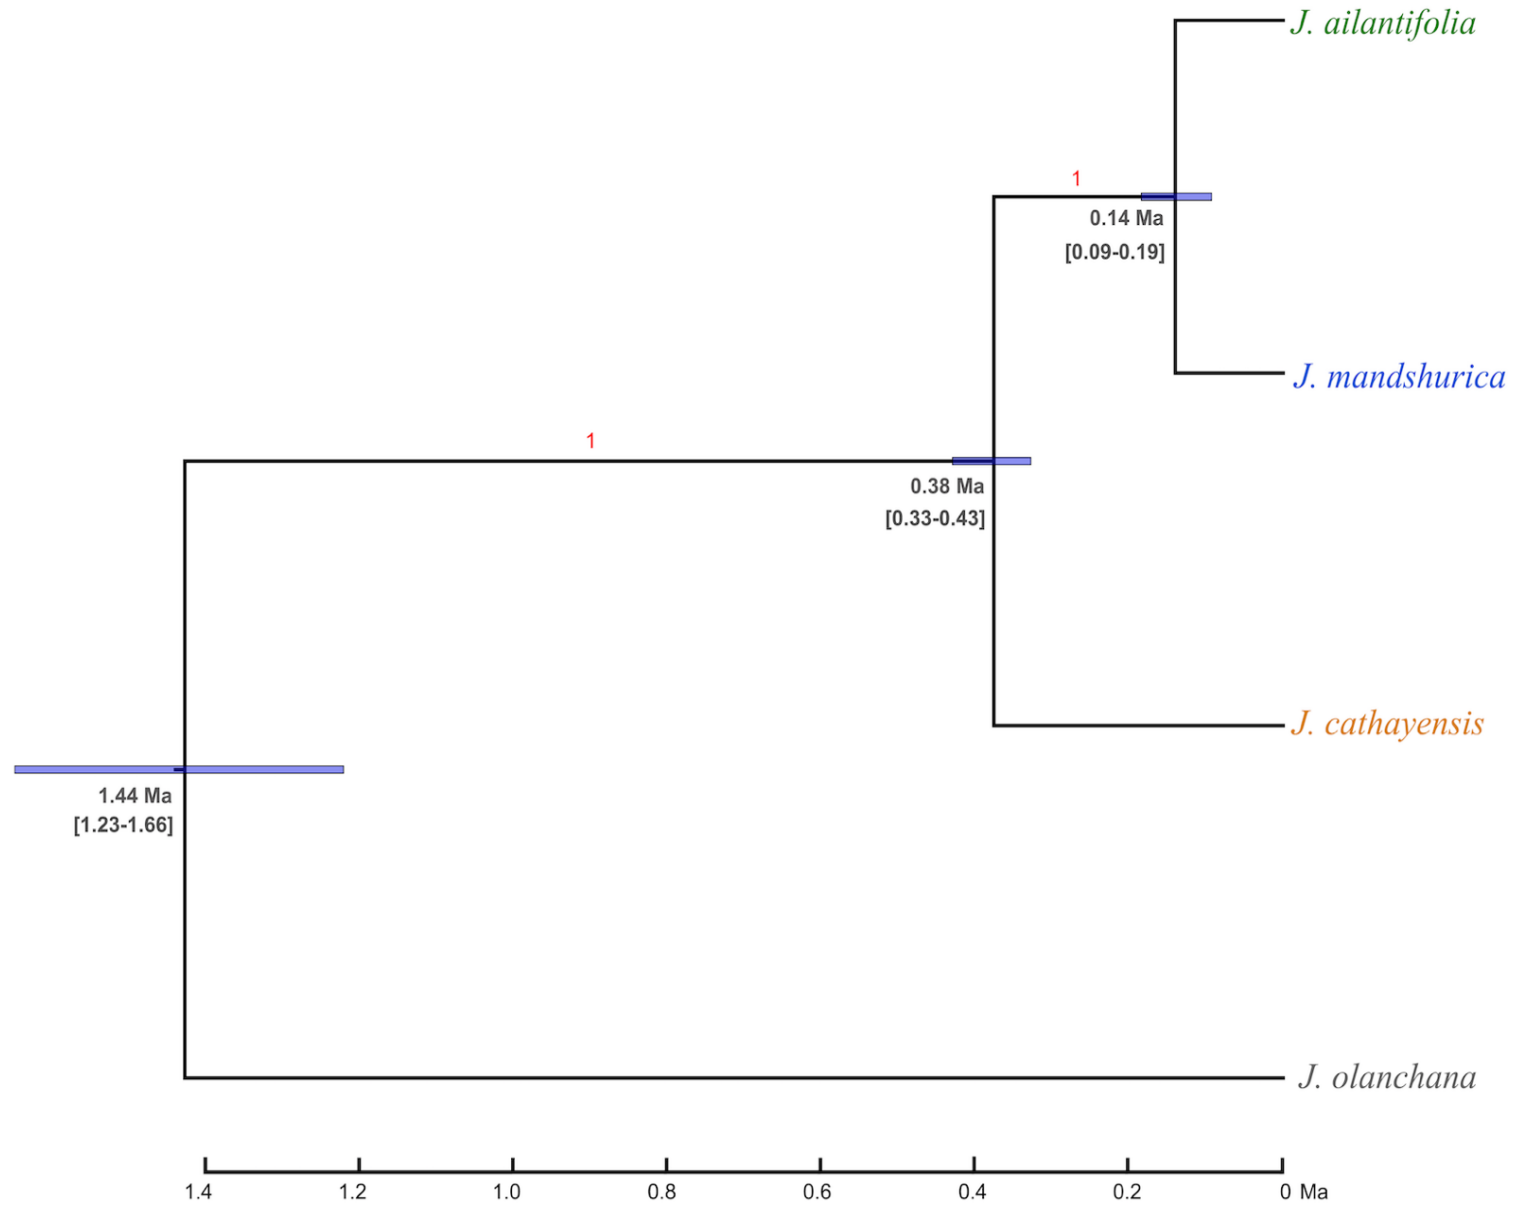

**Fig. S5** Histograms of the STRUCTURE assignment test for 80 individuals of Asian butternuts based on the SNPs of genes interacting with chloroplast (a), mitochondria (b) and dual (both mitochondrial and chloroplast) (c).

(a) chloroplast

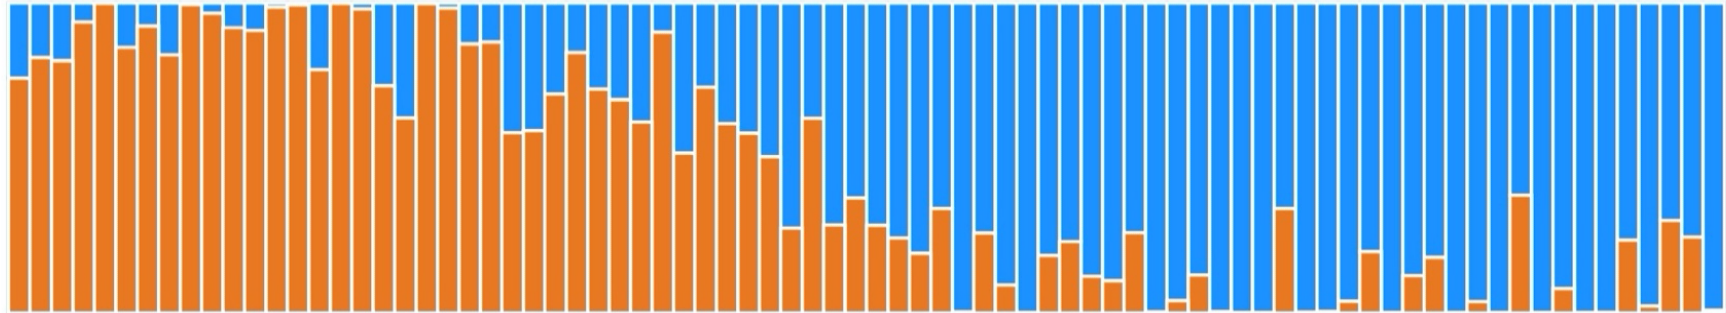

(b) mitochondria

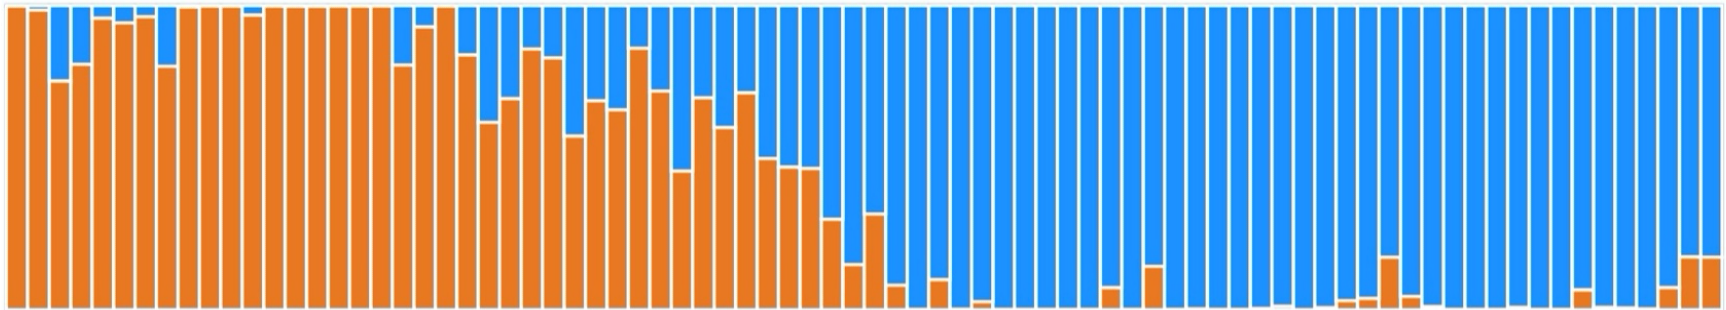

(c) dual

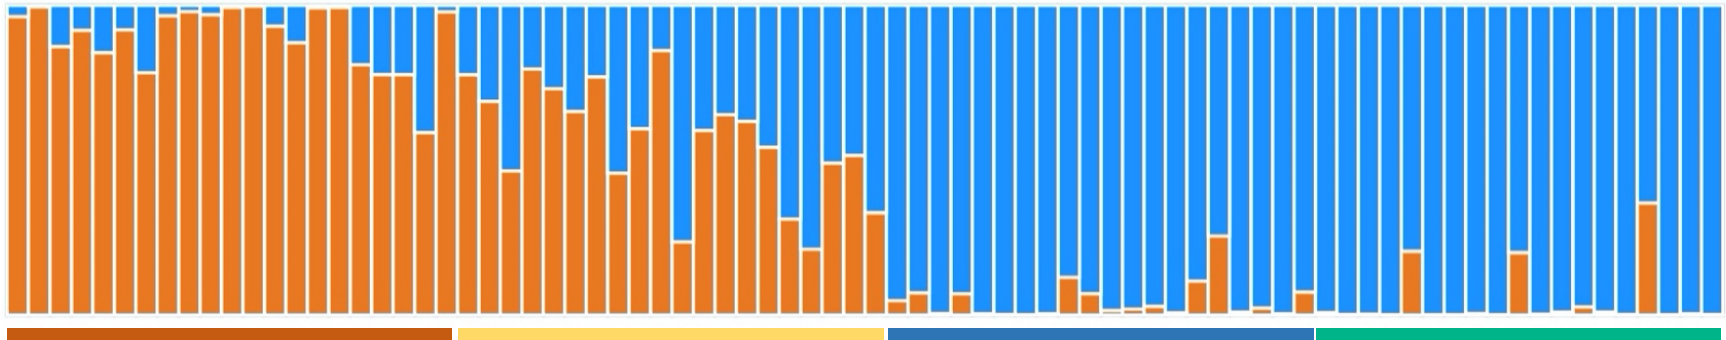

*J. cathayensis*

Admixed individuals

*J. mandshurica*

*J. ailantifolia*

**Fig. S6** Maximum likelihood tree of 300 genes with nucleo-cytoplasmic interaction of Asian butternuts. Bootstrap support values are labeled on each node.

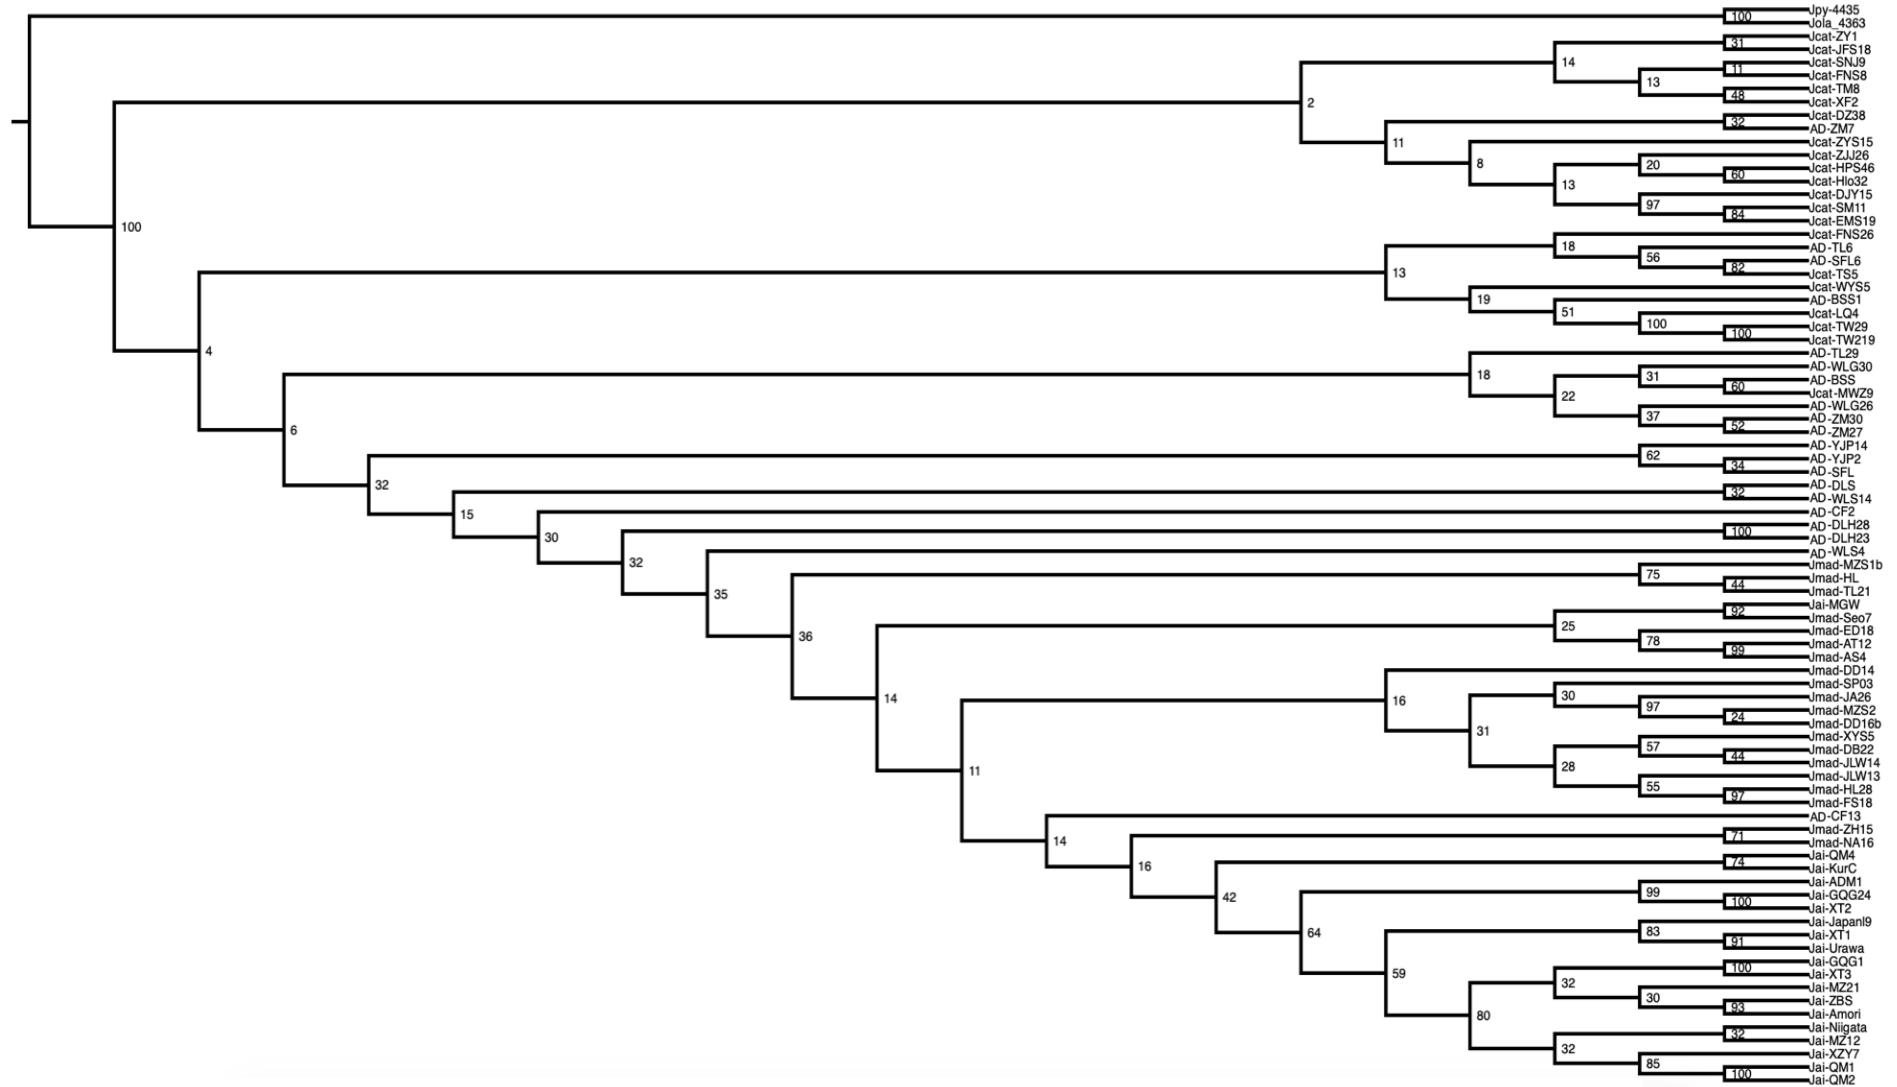



**Table S1.** Details of sample locations and descriptive statistics of genome sequencing for 80 individuals of Asian butternuts.

| Population             | Sample     | Location | Latitude | Longitude | Depth | Coverage | CpDNA<br>haplotype |
|------------------------|------------|----------|----------|-----------|-------|----------|--------------------|
| <i>J. ailantifolia</i> | JA-Amori   | Japan    | 40.82    | 140.82    | 37.80 | 94.85%   | JA_1               |
|                        | JA-GQG24   | Japan    | 36.26    | 139.01    | 31.54 | 94.76%   | JA_2               |
|                        | JA-Japan19 | Japan    | 36.31    | 138.98    | 35.44 | 94.83%   | JA_2               |
|                        | JA-MGW     | Japan    | 35.10    | 136.55    | 35.54 | 94.23%   | JA_2               |
|                        | JA-Urawa   | Japan    | 35.51    | 139.39    | 49.30 | 96.17%   | JA_2               |
|                        | JA-Niigata | Japan    | 37.90    | 139.02    | 33.88 | 95.15%   | JA_2               |
|                        | JA-QM1     | Japan    | 35.79    | 139.24    | 28.63 | 94.64%   | JA_2               |
|                        | JA-QM2     | Japan    | 35.79    | 139.24    | 33.24 | 94.73%   | JA_2               |
|                        | JA-QM4     | Japan    | 35.79    | 139.24    | 31.88 | 94.91%   | JA_2               |
|                        | JA-MZ11    | Japan    | 42.58    | 141.33    | 13.22 | 94.16%   | JA_2               |
|                        | JA-MZ12    | Japan    | 42.58    | 141.33    | 31.59 | 95.06%   | JA_2               |
|                        | JA-MZ21    | Japan    | 42.58    | 141.33    | 29.37 | 94.76%   | JA_2               |
|                        | JA-XT1     | Japan    | 38.27    | 141.03    | 36.55 | 95.07%   | JA_2               |
|                        | JA-XT2     | Japan    | 38.27    | 141.03    | 30.97 | 94.71%   | JA_2               |
|                        | JA-XT3     | Japan    | 38.27    | 141.03    | 32.27 | 94.97%   | JA_2               |
|                        | JA-GQG1    | Japan    | 36.26    | 139.07    | 34.31 | 94.84%   | JA_1               |
|                        | JA-XZY7    | Japan    | 42.86    | 141.32    | 38.76 | 95.12%   | JA_2               |

|                              |          |                        |       |        |       |        |      |
|------------------------------|----------|------------------------|-------|--------|-------|--------|------|
|                              | JA-ZBS   | Japan                  | 36.22 | 140.10 | 37.97 | 95.15% | JA_2 |
|                              | JA-ADM1  | Japan                  | 35.67 | 139.01 | 33.61 | 94.98% | JA_2 |
|                              | Jai-KurC | Japan                  | 37.90 | 139.07 | 41.69 | 94.77% | JA_2 |
| <b><i>J. mandshurica</i></b> | JM-DB22  | Daban Liaoning         | 41.89 | 121.77 | 39.71 | 95.08% | JM_1 |
|                              | JM-MZS1b | Maoershan Heilongjiang | 45.4  | 127.65 | 26.62 | 94.89% | JM_1 |
|                              | JM-MZS2  | Maoershan Heilongjiang | 45.4  | 127.65 | 43.70 | 95.24% | JM_1 |
|                              | JM-NA16  | Ningan Jilin           | 44.35 | 129.53 | 32.66 | 95.02% | JM_2 |
|                              | JM-JA26  | Jian Jilin             | 41.18 | 126.23 | 35.58 | 95.14% | JM_1 |
|                              | JM-SP03  | Siping Jilin           | 43.17 | 124.35 | 31.59 | 95.31% | JM_1 |
|                              | JM-HL    | Hulin Heilongjiang     | 45.86 | 133.00 | 43.89 | 95.40% | JM_1 |
|                              | JM-HL28  | Hulin Heilongjiang     | 45.86 | 133.00 | 35.80 | 95.24% | JM_1 |
|                              | JM-ZH15  | Zhuanghe Liaoning      | 39.70 | 122.97 | 43.45 | 94.88% | JM_1 |
|                              | JM-AT12  | Antu Jilin             | 43.11 | 128.90 | 22.70 | 93.58% | JM_1 |
|                              | JM-ED18  | Erdao Jilin            | 42.49 | 128.24 | 26.62 | 94.94% | JM_1 |
|                              | JM-DD14  | Dandong Liaoning       | 40.30 | 124.16 | 47.36 | 95.21% | JM_1 |
|                              | JM-DD16b | Dandong Liaoning       | 40.30 | 124.16 | 31.52 | 94.80% | JM_1 |
|                              | JM-FS18  | Fushun Liaoning        | 41.96 | 124.25 | 27.33 | 95.03% | JM_1 |
|                              | JM-TL21  | Tieli Heilongjiang     | 47.98 | 128.08 | 20.70 | 94.59% | JM_1 |
|                              | JM-AS4   | Anshan Liaoning        | 41.02 | 123.2  | 30.81 | 94.89% | JM_1 |
|                              | JM-Seo7  | Korea                  | 37.45 | 127.08 | 37.45 | 95.04% | JM_3 |

|                       |          |                     |       |        |       |        |       |
|-----------------------|----------|---------------------|-------|--------|-------|--------|-------|
|                       | JM-JLW13 | Korea               | 37.43 | 128.56 | 24.15 | 94.93% | JM_2  |
|                       | JM-JLW14 | Korea               | 37.43 | 128.56 | 33.42 | 95.25% | JM_2  |
|                       | JM-XYS5  | Korea               | 38.17 | 128.49 | 42.44 | 95.43% | JM_2  |
| <i>J. cathayensis</i> | JC-DZ38  | Dongzhai Henan      | 30.9  | 114.27 | 29.19 | 94.75% | JC_6  |
|                       | JC-ZYS15 | Ziyunshan Hunan     | 26.69 | 111.1  | 26.69 | 94.55% | JC_2  |
|                       | JC-FNS26 | Funiushan Henan     | 33.32 | 111.50 | 31.62 | 94.84% | JC_11 |
|                       | JC-FNS8  | Funiushan Henan     | 33.32 | 111.50 | 32.63 | 94.65% | JC_11 |
|                       | JC-HPS46 | Haopingsi Shaanxi   | 34.07 | 107.70 | 27.36 | 94.60% | JC_10 |
|                       | JC-WYS5  | Wuyishan Jiangxi    | 27.72 | 117.71 | 35.88 | 94.62% | JC_4  |
|                       | JC-JFS18 | Jiefushan Hunan     | 27.25 | 111.72 | 27.15 | 94.38% | JC_1  |
|                       | JC-LQ4   | Longquan Zhejiang   | 27.87 | 119.15 | 27.50 | 93.90% | JC_5  |
|                       | JC-TM8   | Tianmushan Zhejiang | 30.36 | 119.45 | 29.04 | 94.55% | JC_7  |
|                       | JC-SNJ9  | Shennongjia Hubei   | 31.40 | 109.93 | 24.99 | 94.53% | JC_9  |
|                       | JC-TS5   | Tianshui Gansu      | 34.31 | 106.12 | 30.89 | 94.76% | JC_10 |
|                       | JC-ZY1   | Zunyi Guizhou       | 28.22 | 107.16 | 36.99 | 94.65% | JC_13 |
|                       | JC-TW219 | Taiwan              | 24.39 | 121.35 | 34.59 | 94.48% | JC_3  |
|                       | JC-TW29  | Taiwan              | 24.39 | 121.35 | 34.55 | 94.23% | JC_3  |
|                       | JC-ZJJ26 | Zhangjiajie Hunan   | 29.08 | 110.29 | 42.78 | 94.35% | JC_8  |
|                       | JC-DJY15 | Dujiangyan Sichuan  | 30.96 | 103.38 | 38.86 | 94.57% | JC_15 |
|                       | JC-EMS19 | Ermeishan Sichuan   | 29.58 | 103.36 | 28.17 | 94.73% | JC_16 |

|                            |          |                      |       |        |       |        |       |
|----------------------------|----------|----------------------|-------|--------|-------|--------|-------|
|                            | JC-Hlo32 | Huanglong Sichuan    | 32.69 | 104.06 | 39.39 | 94.73% | JC_10 |
|                            | JC-SM11  | Shimian Sichuan      | 29.21 | 102.38 | 37.16 | 94.86% | JC_14 |
|                            | JC-MWZ9  | Mawuzhai Shanxi      | 35.78 | 113.27 | 34.35 | 94.79% | JC_11 |
|                            | JC-XF2   | Xianfeng Hubei       | 29.40 | 109.11 | 43.17 | 94.67% | JC_12 |
| <b>Admixed individuals</b> | AD-CF2   | Chifeng Neimenggu    | 43.28 | 117.42 | 28.51 | 94.93% | JM_1  |
|                            | AD-CF13  | Chifeng Neimenggu    | 43.28 | 117.42 | 39.55 | 94.92% | JM_1  |
|                            | AD-DLS   | Donglingshan Beijing | 39.97 | 115.42 | 29.55 | 93.03% | JM_1  |
|                            | AD-DLH23 | Daluhua Liaoning     | 41.51 | 121.62 | 42.32 | 95.21% | JM_1  |
|                            | AD-DLH28 | Daluhua Liaoning     | 41.51 | 121.62 | 29.22 | 95.10% | JM_1  |
|                            | AD-SFL6  | Shifoling Hebei      | 39.97 | 115.35 | 28.39 | 95.02% | JM_1  |
|                            | AD-SFL   | Shifoling Hebei      | 39.97 | 115.35 | 32.13 | 94.78% | JM_1  |
|                            | AD-TL6   | Tuoliang Shanxi      | 38.73 | 113.80 | 32.59 | 92.32% | JC_11 |
|                            | AD-TL29  | Tuoliang Shanxi      | 38.73 | 113.80 | 35.48 | 94.70% | JC_11 |
|                            | AD-YJP14 | Yangjiaping Hebei    | 39.97 | 115.39 | 34.38 | 94.83% | JM_1  |
|                            | AD-YJP2  | Yangjiaping Hebei    | 39.97 | 115.39 | 35.61 | 94.87% | JM_1  |
|                            | AD-ZM27  | Zhangmo Hebei        | 37.35 | 114.17 | 39.10 | 94.75% | JC_11 |
|                            | AD-ZM30  | Zhangmo Hebei        | 37.35 | 114.17 | 33.27 | 94.82% | JC_11 |
|                            | AD-ZM7   | Zhangmo Hebei        | 37.36 | 114.22 | 27.54 | 94.85% | JC_11 |
|                            | AD-BSS   | Baishishan Hebei     | 39.37 | 114.69 | 28.97 | 91.99% | JC_11 |
|                            | AD-BSS1  | Baishishan Hebei     | 39.37 | 114.69 | 27.51 | 94.91% | JC_11 |

|           |                  |       |        |       |        |       |
|-----------|------------------|-------|--------|-------|--------|-------|
| AD- WLG30 | Wulonggou Hebei  | 39.49 | 114.93 | 32.69 | 95.02% | JC_11 |
| AD-WLG26  | Wulonggou Hebei  | 39.49 | 114.93 | 21.59 | 95.03% | JM_1  |
| AD-WLS4   | Wulingshan Hebei | 40.96 | 117.93 | 28.00 | 95.12% | JM_1  |
| AD-WLS14  | Wulingshan Hebei | 40.96 | 117.93 | 34.18 | 95.13% | JM_1  |

---

**Table S2.** Environmental variables used in our study.

| <b>Category</b> | <b>Code</b> | <b>Description</b>                                                                  |
|-----------------|-------------|-------------------------------------------------------------------------------------|
| Annual          | TD          | Temperature difference between MWMT and MCMT, or continentality (°C)                |
| Annual          | EXT         | Extreme maximum temperature over 30 years                                           |
| Seasonal        | CMD_MAM     | Hargreaves climatic moisture deficit in March, April and May                        |
| Seasonal        | PPT_SON     | Precipitation in September, October and November                                    |
| Seasonal        | Eref_JJA    | Hargreaves reference evaporation in June, July and August                           |
| Seasonal        | CMD_SON     | Hargreaves climatic moisture deficit in September, October and November             |
| Annual          | AHM         | Annual heat: moisture index $((MAT+10)/(MAP/1000))$                                 |
| Annual          | PAS         | Precipitation as snow (mm) between August in previous year and July in current year |
| Seasonal        | PPT_DJF     | Precipitation in December, January and February                                     |
| Annual          | MAP         | Mean annual precipitation (mm)                                                      |
| Seasonal        | PPT_MAM     | Precipitation in March, April and May                                               |
| Annual          | CMD         | Hargreaves climatic moisture deficit                                                |
| Seasonal        | PPT_JJA     | Precipitation in June, July and August                                              |
| Seasonal        | CMD_JJA     | Hargreaves climatic moisture deficit in June, July and August                       |
| Seasonal        | Tmin_JJA    | Minimum temperature in June, July and August                                        |
| Seasonal        | PAS_MAM     | Precipitation as snow (mm) between August in previous year and July in current year |
| Seasonal        | DD5_JJA     | Degree-days above 5°C in June, July and August                                      |

|          |          |                                                                     |
|----------|----------|---------------------------------------------------------------------|
| Annual   | MWMT     | Mean warmest month temperature (°C)                                 |
| Annual   | MCMT     | Mean coldest month temperature (°C)                                 |
| Seasonal | Tave_JJA | Mean temperature in June, July and August                           |
| Annual   | Eref     | Hargreaves reference evaporation                                    |
| Seasonal | Tmax_JJA | Maximum temperature in June, July and August                        |
| Seasonal | Tmax_DJF | Maximum temperature in December, January and February               |
| Seasonal | Eref_MAM | Hargreaves reference evaporation in March, April and May            |
| Seasonal | DD_0_DJF | Degree-days below 0°C in December, January and February             |
| Seasonal | Tmax_MAM | Maximum temperature in March, April and May                         |
| Annual   | EMT      | Extreme minimum temperature over 30 years                           |
| Seasonal | Tmin_DJF | Minimum temperature in December, January and February               |
| Seasonal | NFFD_MAM | The number of frost-free days in March, April and May               |
| Seasonal | Tave_DJF | Mean temperature in December, January and February                  |
| Seasonal | DD5_SON  | Degree-days above 5°C in September, October and November            |
| Seasonal | Tmin_SON | Minimum temperature in September, October and November              |
| Annual   | DD_0     | Degree-days below 0°C                                               |
| Annual   | DD5      | Degree-days above 5°C                                               |
| Seasonal | DD5_MAM  | Degree-days above 5°C in March, April and May                       |
| Seasonal | NFFD_SON | The number of frost-free days in September, October and November    |
| Seasonal | Eref_SON | Hargreaves reference evaporation in September, October and November |
| Annual   | NFFD     | The number of frost-free days                                       |
| Seasonal | Tmin_MAM | Minimum temperature in March, April and May                         |
| Seasonal | Tmax_SON | Maximum temperature in September, October and November              |
| Seasonal | DD_0_MAM | Degree-days below 0°C in March, April and May                       |
| Seasonal | Tave_SON | Mean temperature in September, October and November                 |

|          |          |                                                                                     |
|----------|----------|-------------------------------------------------------------------------------------|
| Seasonal | Tave_MAM | Mean temperature in March, April and May                                            |
| Seasonal | DD_0_SON | Degree-days below 0°C in September, October and November                            |
| Annual   | MAT      | Mean annual temperature (°C)                                                        |
| Seasonal | PAS_JJA  | Precipitation as snow (mm) between August in previous year and July in current year |
| Seasonal | DD5_DJF  | Degree-days above 5°C in December, January and February                             |
| Seasonal | CMD_DJF  | Hargreaves climatic moisture deficit in December, January and February              |
| Seasonal | Eref_DJF | Hargreaves reference evaporation in December, January and February                  |

---



**Notes 1.** Orthologous single copy nuclear genes extraction.

First, we mapped short reads of 30 individuals of Asian butternuts and an outgroup (*J. olanchana*) to *J. mandshurica* reference genome using the BWA-MEM algorithm in BWA v. 0.7.12. The consensus sequence was called using the SAMTOOLS v.1.3 suite utilizing the samtools mpileup, bcftools and vcfutils.pl (varFilter) pipeline. To ensure a consensus sequence of high confidence, we set the software parameters -C to 50, -q to 20, -Q to 20, and removed the insertion and deletion as well as variation within 3bp around them. Minimum read depth (-d) and maximum read depth (-D) were set to 10 and 60 and marked the sites lower than 10× and higher than 60× as missing data “N”. Consensus genomes were built based on the above SNPs for each individual (Nielsen *et al.*, 2011). CDS were extracted from the consensus genome, based on the annotation and orthologous analysis by Zhang *et al.* (2019).

Next, we used OrthoFinder v0.4.0 (Emms & Kelly, 2015) and ProteinOrtho v6.0.23 (Lechner *et al.*, 2014) to distinguish orthologous single-copy genes of seven reference genome, and obtained 4,006 and 3,312 genes, respectively. A total of 1,645 genes were remained in the two datasets. The genes whose length are between 300 bp to 1,000 bp and more than 50 kb far apart and less than 50% of missing match were remained. Finally, we obtained 1,622 genes for butternuts. Protein sequences of each gene were aligned by MAFFT v. 7.273 (Kato *et al.*, 2002) , and corresponding codons were assigned into codon alignments by PAL2NAL v. 14 (Suyama *et al.*, 2006).

**Notes 2.** Python script (Caculate\_mktest.py) for conducting McDonald-Kreitman tests (see separate file).

**Notes 3.** Environmental variables identification for Gradient forest (GF) analyses.

For each sampling location, we used a high-resolution climate database, climateAP (Wang *et al.*, 2017) to choose 49 variables with known impacts on plant survival and development, including 14 annual and 35 seasonal environmental variables (Table S2) (Jia *et al.*, 2020). We performed GF analyses to identify the environmental variables that best explained the distribution of genetic diversity using the R package Gradient forest (Ellis *et al.*, 2012). To be sure the SNPs are independent, we kept only one SNP per 20 kb for GF analyses. We used 1,000 regression trees per SNP to fit GF model while keeping all the parameters set at default values. After evaluating the accuracy importance and Pearson pairwise correlations among these variables, 11 variables with absolute value of Pearson correlation coefficient ( $r$ )  $\leq 0.8$  and accuracy important  $\geq 0.004$  were retained for the following analysis (Fig. S3). The 11 selected climate variables were used to calculate environmental distances by first scaling and centering the variables to account for differences in magnitude, then calculating pairwise Euclidean differences between sites.

- Ellis N, Smith SJ, Pitcher CR. 2012.** Gradient forests: calculating importance gradients on physical predictors. *Ecology* **93**: 156-168.
- Emms DM, Kelly S. 2015.** OrthoFinder: solving fundamental biases in whole genome comparisons dramatically improves orthogroup inference accuracy. *Genome Biology* **16**: doi:10.1186/s13059-015-0721-2.
- Jia KH, Zhao W, Maier PA, Hu XG, Jin YQ, Zhou SS, Jiao SQ, El-Kassaby YA, Wang TL, Wang XR, et al. 2020.** Landscape genomics predicts climate change-related genetic offset for the widespread *Platycladus orientalis* (Cupressaceae). *Evolutionary Applications* **13**: 665-676.
- Katoh K, Misawa K, Kuma K, Miyata T. 2002.** MAFFT: a novel method for rapid multiple sequence alignment based on fast Fourier transform. *Nucleic Acids Research* **30**: 3059-3066.
- Lechner M, Hernandez-Rosales M, Doerr D, Wieseke N, Thevenin A, Stoye J, Hartmann RK, Prohaska SJ, Stadler PF. 2014.** Orthology Detection Combining Clustering and Synteny for Very Large Datasets. *PLoS One* **9**: e105015.
- Nielsen R, Paul JS, Albrechtsen A, Song YS. 2011.** Genotype and SNP calling from next-generation sequencing data. *Nature Reviews Genetics* **12**: 443-451.
- Suyama M, Torrents D, Bork P. 2006.** PAL2NAL: robust conversion of protein sequence alignments into the corresponding codon alignments. *Nucleic Acids Research* **34**: W609-W612.
- Wang T, Wang G, Innes JL, Seely B, Chen B. 2017.** ClimateAP: an application for dynamic local downscaling of historical and future climate data in Asia Pacific. *Frontiers of Agricultural Science and Engineering* **4**: 448-458.
- Zhang BW, Xu LL, Li N, Yan PC, Jiang XH, Woeste KE, Lin K, Renner SS, Zhang DY, Bai WN. 2019.** Phylogenomics Reveals an Ancient Hybrid Origin of the Persian Walnut. *Molecular Biology and Evolution* **36**: 2451-2461.
